# Supplementary material
Source: publisher figshare collection journal article supplement (https://diabetesjournals.figshare.com/ndownloader/files/27442823)
Supplement: Supplementary file 1 [file 27442823]

Baseline predictors of glycemic worsening in youth and adults with impaired glucose tolerance or recently-diagnosed type 2 diabetes in the Restoring Insulin Secretion (RISE) Study

### **Supplemental Materials**

1. Table S1
2. Figure S1
3. Figure S2
4. Figure S3
5. Investigators Appendix

**Supplementary Table S1. Baseline characteristics of study participants**

|                                                      | <b>Adult</b>          | <b>Pediatric</b>       | <b>p-value</b> |
|------------------------------------------------------|-----------------------|------------------------|----------------|
| N                                                    | 267                   | 91                     |                |
| Age at randomization (years)                         | 53.9 ± 8.9            | 14.4 ± 2.1             | <0.001         |
| Age Category (years)                                 |                       |                        | <0.001         |
| ≤14                                                  | 0 (0.0%)              | 48 (52.7%)             |                |
| 15-19                                                | 0 (0.0%)              | 43 (47.3%)             |                |
| 20-39                                                | 22 (12.3%)            | 0 (0.0%)               |                |
| 40-49                                                | 48 (26.8%)            | 0 (0.0%)               |                |
| 50-65                                                | 109 (60.9%)           | 0 (0.0%)               |                |
| Sex                                                  |                       |                        | <0.001         |
| Female                                               | 114 (42.7%)           | 65 (71.4%)             |                |
| Male                                                 | 153 (57.3%)           | 26 (28.6%)             |                |
| Race/Ethnicity                                       |                       |                        | <0.001         |
| White                                                | 141 (52.8%)           | 25 (27.5%)             |                |
| Black                                                | 81 (30.3%)            | 23 (25.3%)             |                |
| Hispanic (any)                                       | 28 (10.5%)            | 34 (37.4%)             |                |
| All other                                            | 17 (6.4%)             | 9 (9.9%)               |                |
| Weight (kg)                                          | 102.1 ± 19.8          | 99.8 ± 24.4            | 0.410          |
| BMI (kg/m <sup>2</sup> )                             | 35.0 ± 5.7            | 36.7 ± 6.4             | 0.024          |
| Diabetes status at screening                         |                       |                        | 0.014          |
| IGT                                                  | 197 (73.8%)           | 54 (59.3%)             |                |
| Diabetes                                             | 70 (26.2%)            | 37 (40.7%)             |                |
| Laboratory values at baseline                        |                       |                        |                |
| OGTT                                                 |                       |                        |                |
| HbA1c (%)                                            | 5.75 ± 0.39           | 5.71 ± 0.58            | 0.556          |
| HbA1c (mol/mmol)                                     | 39.30 ± 4.24          | 38.87 ± 6.37           | 0.556          |
| Fasting glucose (mmol/L)                             | 6.15 ± 0.63           | 6.01 ± 0.95            | 0.198          |
| Fasting insulin (pmol/L)                             | 105.3 [34.3, 323.8]   | 229.9 [74.9, 705.8]    | <0.001         |
| Fasting C-Peptide (nmol/L)                           | 1.245 ± 0.507         | 1.711 ± 0.607          | <0.001         |
| 2-hour glucose (mmol/L)                              | 10.07 ± 2.29          | 10.20 ± 2.62           | 0.670          |
| 2-hour insulin (pmol/L)                              | 790.1 [234.2, 2665.8] | 1369.1 [346.6, 5407.9] | <0.001         |
| 1/Fasting insulin x 10 <sup>-3</sup><br>(1/(pmol/L)) | 11.1 ± 6.6            | 5.2 ± 3.6              | <0.001         |
| IGI (0-30m I/G) (pmol/mmol)                          | 113.1 [27.2, 469.7]   | 226.5 [45.8, 1120.5]   | <0.001         |
| CPGI (0-30m CP/G)<br>(nmol/mmol)                     | 0.464 ± 0.280         | 0.741 ± 0.430          | <0.001         |
| Values during baseline<br>hyperglycemic clamp        |                       |                        |                |
| ACPRg (nmol/L)                                       | 1.75 [0.99, 3.11]     | 2.35 [0.87, 6.35]      | <0.001         |
| SSCP (nmol/L)                                        | 3.95 [1.96, 7.98]     | 5.15 [2.39, 11.13]     | <0.001         |
| ACPRmax (nmol/L)                                     | 4.89 [2.03, 11.78]    | 7.72 [3.35, 17.77]     | <0.001         |
| M/I x 10 <sup>-5</sup>                               | 3.064 [0.724, 12.965] | 1.572 [0.353, 6.997]   | <0.001         |

Supplementary Figure S1: CONSORT Diagram, RISE Pediatric Medication Study with OGTT data

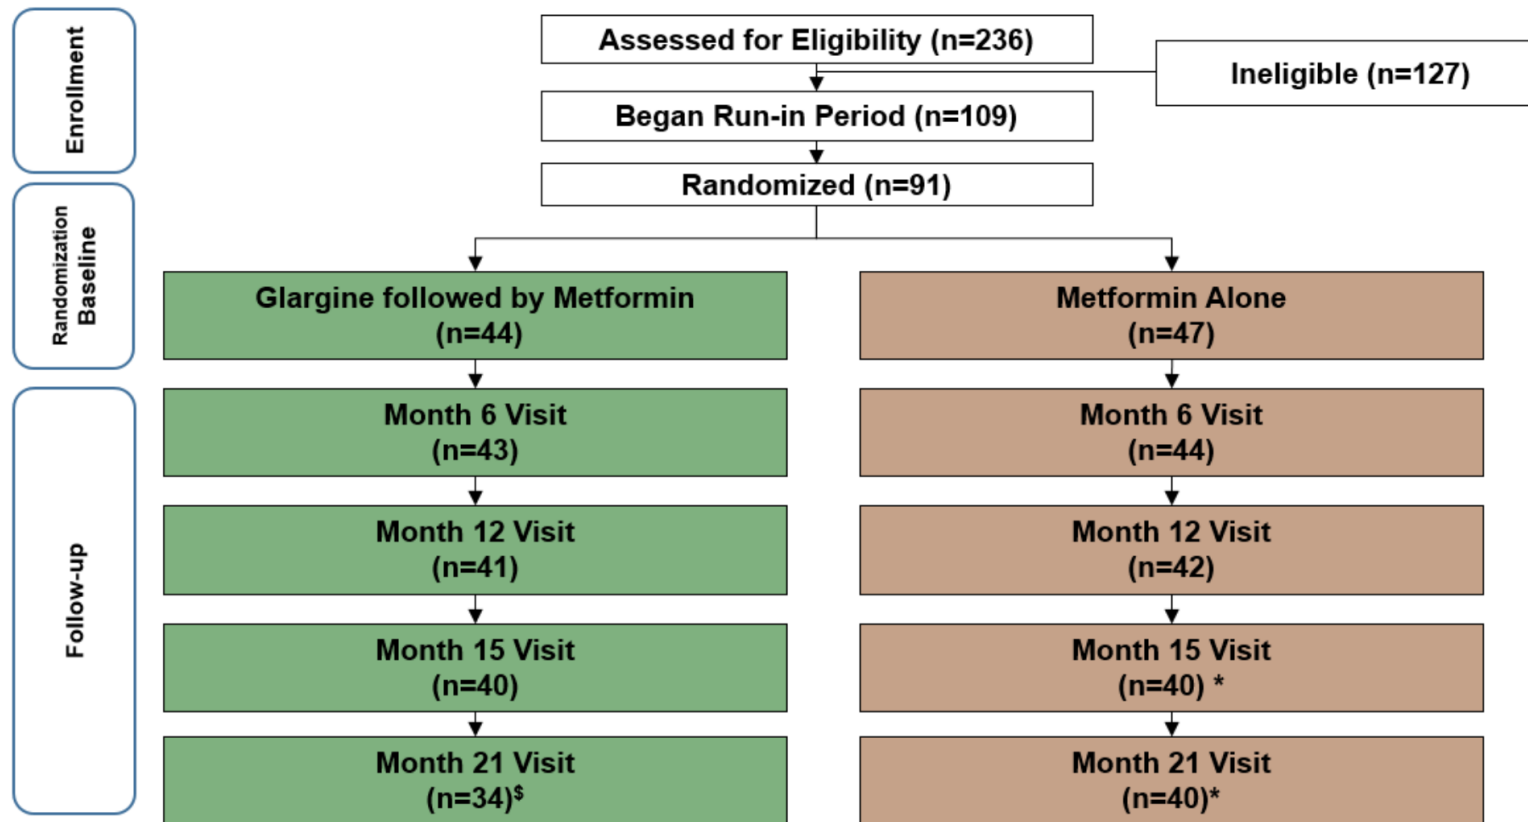

<sup>\$</sup>4 participants in the metformin group decompensated at Months 15 and 18. No further visits were completed.

<sup>\*</sup>2 participants in the glargine followed by metformin group decompensated between months 9 and 12, and 1 participant decompensated at M18. No further visits were completed.

Supplementary Figure S2: CONSORT Diagram: RISE Adult Medication Study with OGTT data

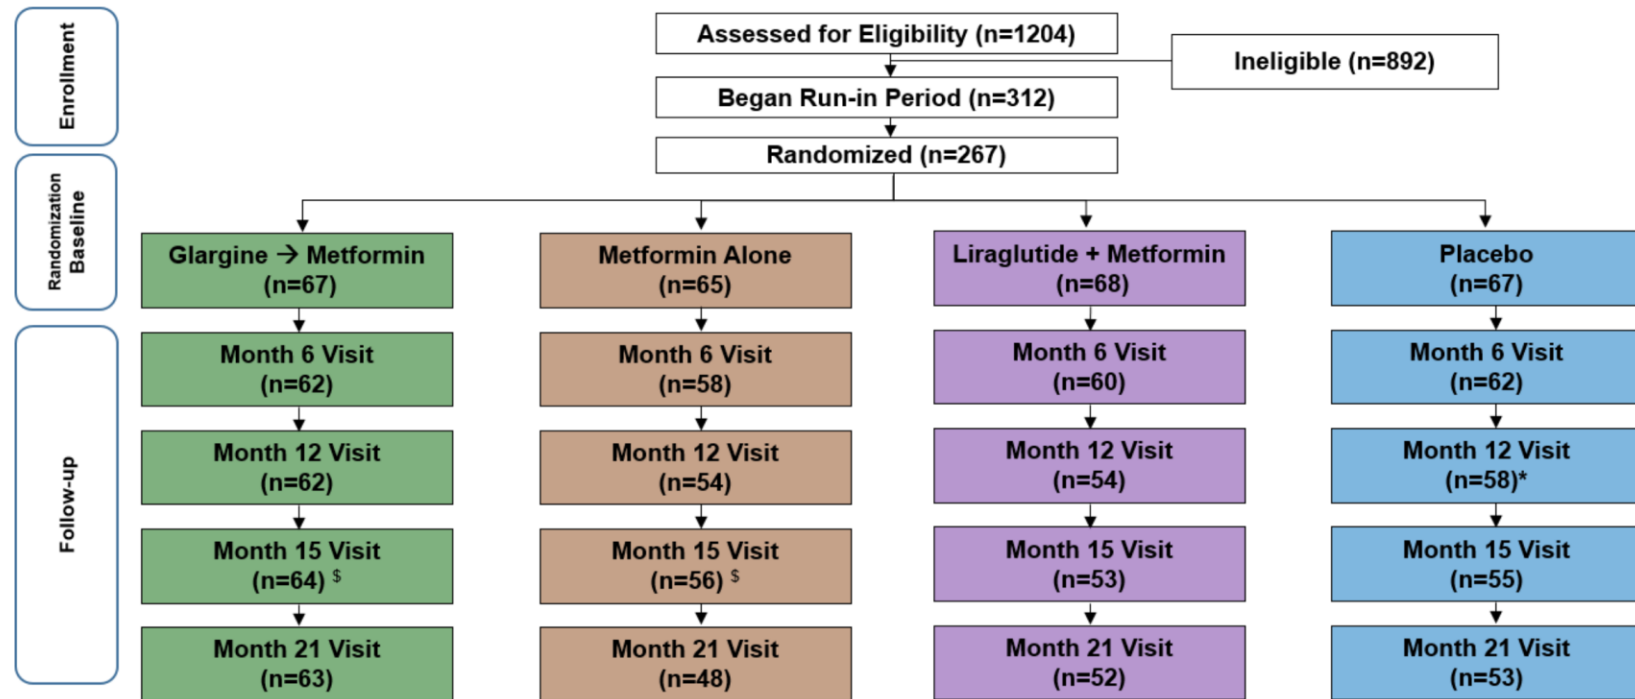

\*1 participant in the placebo group decompensated at M12; No further visits were completed

<sup>§</sup> 1 participant in the metformin group and 1 participant in the glargine followed by metformin group were put on metformin by their primary care provider after the M15 visit. No further visits were completed.

Supplementary Figure S3: RISE Medication Studies Visit and Assessment Timeline

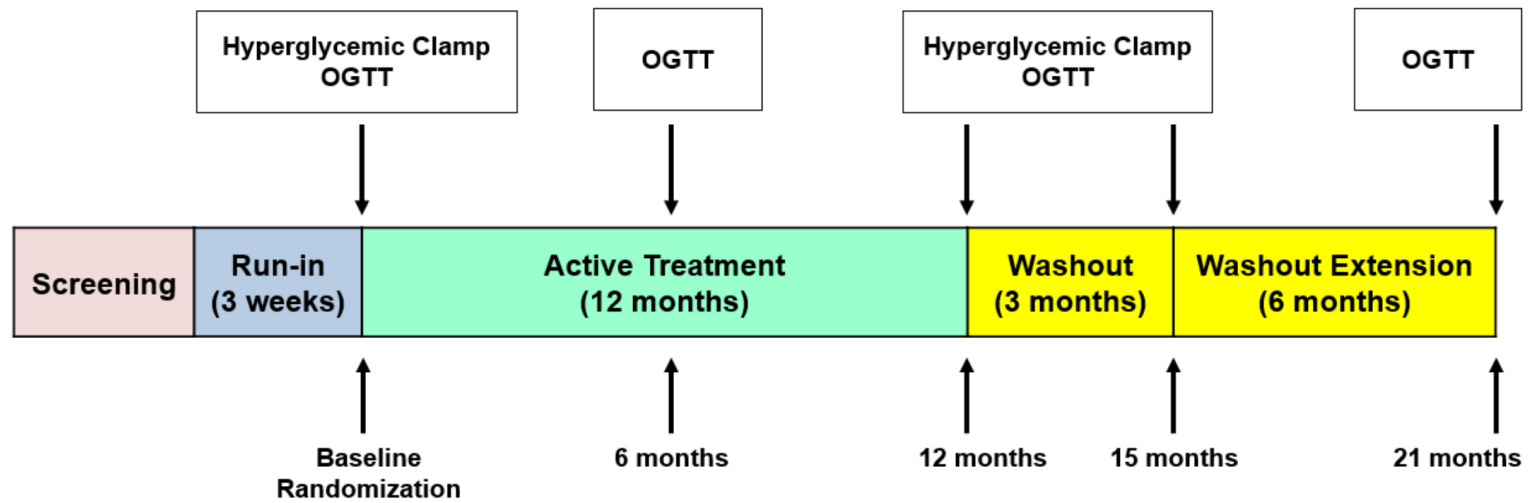

## APPENDIX

### RISE Consortium Investigators

**University of Chicago Clinical Research  
Center and Jesse Brown VA Medical Center  
(Chicago, IL)**

David A. Ehrmann, MD\*  
Karla A. Temple, PhD, RD\*\*  
Abby Rue\*\*  
Elena Barengolts, MD  
Babak Mokhlesi, MD, MSc  
Eve Van Cauter, PhD  
Susan Sam, MD, MSc  
M. Annette Miller, RN

**VA Puget Sound Health Care System and  
University of Washington  
(Seattle, WA)**

Steven E. Kahn, MB, ChB\*  
Karen M. Atkinson, RN\*\*  
Jerry P. Palmer, MD  
Kristina M. Utzschneider, MD  
Tsige Gebremedhin, BS  
Abigail Kernan-Schloss, BA  
Alexandra Kozedub, MSN, ARNP  
Brenda K. Montgomery, RN, BSN, CDE  
Emily J. Morse, BS

**Indiana University School of Medicine and  
Richard L. Roudebush VA Medical Center  
(Indianapolis, IN)**

Kieren J. Mather, MD\*  
Tammy Garrett, RN\*\*  
Tamara S. Hannon, MD  
Amale Lteif, MD  
Aniket Patel MD  
Robin Chisholm, RN  
Karen Moore, RN  
Vivian Pirics, RN  
Linda Pratt, RN

**University of Colorado Denver/Children's  
Hospital Colorado  
(Denver, CO)**

Kristen J. Nadeau, MD, MS\*  
Susan Gross, RD\*\*  
Philip S. Zeitler, MD, PhD  
Jayne Williams, RN, MSN, CPNP  
Melanie Cree-Green, MD, PhD  
Yesenia Garcia Reyes, MS  
Krista Vissat, RN, MSN, CPNP

**Children's Hospital of Pittsburgh of UPMC  
(Pittsburgh, PA)**

Silva A. Arslanian, MD\*  
Kathleen Brown, RN, CDE\*\*  
Nancy Guerra, CRNP  
Kristin Porter, RN, CDE

**Yale University  
(New Haven, CT)**

Sonia Caprio, MD\*  
Mary Savoye, RD, CDE\*\*  
Bridget Pierpont, MS\*\*

**University of Southern California Keck School  
of Medicine/Kaiser Permanente Southern  
California  
(Los Angeles, CA)**

Thomas A. Buchanan, MD\*  
Anny H. Xiang, PhD\*  
Enrique Trigo, MD\*\*  
Elizabeth Beale, MD  
Fadi N. Hendee, MD  
Namir Katkhouda, MD  
Krishan Nayak, PhD  
Mayra Martinez, MPH  
Cortney Montgomery, BS  
Xinhui Wang, PhD

**George Washington University Biostatistics  
Center  
(RISE Coordinating Center; Rockville, MD)**

Sharon L. Edelstein, ScM\*  
John M. Lachin, ScD  
Ashley N. Hogan, MPH

**Northwest Lipid Research Laboratories  
(Central Biochemistry Laboratory; Seattle,  
WA)**

Santica Marcovina, PhD\*  
Jessica Harting\*\*  
John Albers, PhD

**Belmar Pharmacy  
(Drug Distribution Center; Lakewood, CO)**

Dave Hill

**NIH/NIDDK  
(Bethesda, MD)**

Peter J. Savage, MD  
Ellen W. Leschek, MD

\* denotes Principal Investigator  
\*\* denotes Program Coordinator
